# Supplementary material for: Superior X-ray Radiation Shielding Effectiveness of Biocompatible Polyaniline Reinforced with Hybrid Graphene Oxide-Iron Tungsten Nitride Flakes
Source: PubMed Central journal article supplement (PMC7361692; doi:10.3390/polym12061407), 2020-06-23
Supplement: polymers-12-01407-s001.pdf [file polymers-12-01407-s001.pdf]

*Supporting Information*

# Superior X-ray Radiation Shielding Effectiveness of Biocompatible Polyaniline Reinforced with Hybrid Graphene Oxide-Iron Tungsten Nitride Flakes

Seyyed Alireza Hashemi <sup>1,2,\*</sup>, Seyyed Mojtaba Mousavi <sup>3,2</sup>, Reza Faghihi <sup>4,5</sup>, Mohammad Arjmand <sup>6</sup>, Mansour Rahsepar <sup>7</sup>, Sonia Bahrani <sup>2</sup>, Seeram Ramakrishna <sup>1</sup>, and Chin Wei Lai <sup>8</sup>

<sup>1</sup> Department of Mechanical Engineering, Center for Nanofibers and Nanotechnology, National University of Singapore, Singapore; [seeram@nus.edu.sg](mailto:seeram@nus.edu.sg)

<sup>2</sup> Department of Medical Nanotechnology, School of Advanced Medical Sciences and Technologies, Shiraz University of Medical Sciences, Shiraz, Iran; [kmepo.smm@gmail.com](mailto:kmepo.smm@gmail.com) (S.M.M.); [s.bahrani22@gmail.com](mailto:s.bahrani22@gmail.com) (S.B.)

<sup>3</sup> Department of Chemical Engineering, National Taiwan University of Science and Technology, Taiwan

<sup>4</sup> Nuclear Engineering Department, Shiraz University, Shiraz, Iran. 71936-16548; [faghihir@shirazu.ac.ir](mailto:faghihir@shirazu.ac.ir)

<sup>5</sup> Radiation Research Center, Shiraz University, Shiraz, Iran. 71936-16548

<sup>6</sup> School of Engineering, University of British Columbia, Kelowna, BC, V1V 1V7, Canada; [mohammad.arjmand@ubc.ca](mailto:mohammad.arjmand@ubc.ca)

<sup>7</sup> Department of Materials Science and Engineering, School of Engineering, Shiraz University, Zand Boulevard, Shiraz, Iran. 71348-51154; [mansour.rahsepar@gmail.com](mailto:mansour.rahsepar@gmail.com)

<sup>8</sup> Nanotechnology & Catalysis Research Center, University of Malaya, Malaysia; [cwlai@um.edu.my](mailto:cwlai@um.edu.my)

\* Correspondence: [sa\\_hashemi@sums.ac.ir](mailto:sa_hashemi@sums.ac.ir) (S.A.H.); Tel: 0098 9398432509

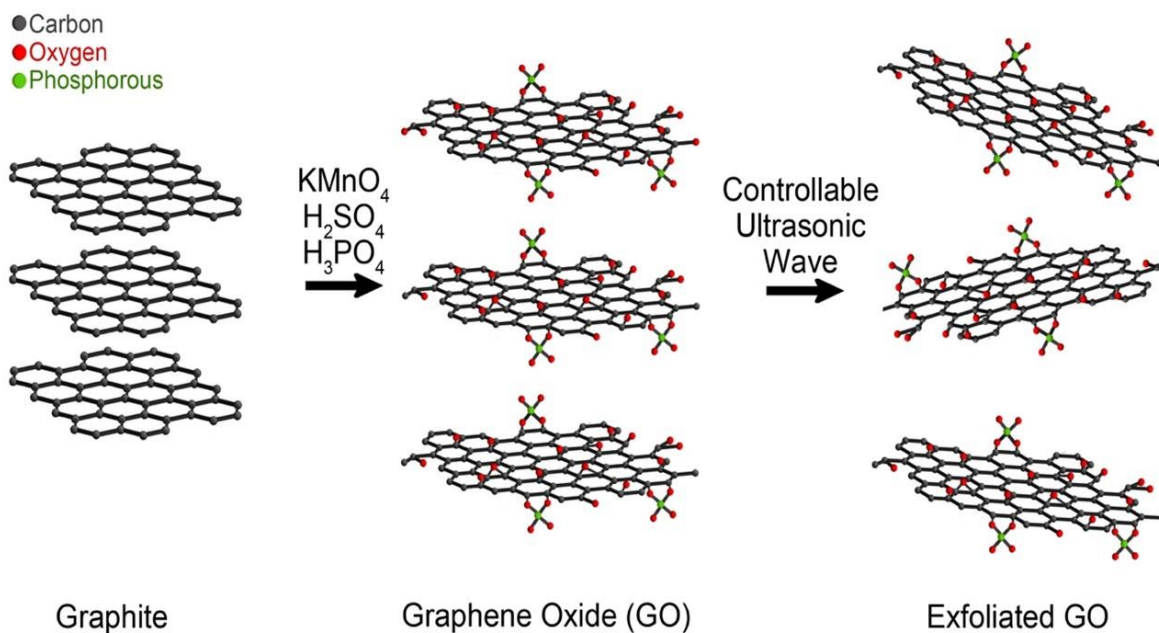

**Figure S1.** Formation of GO out of pure graphite flakes.

**Table S1.** Specification of developed samples.

| Sample Number | GO-ITN (wt%) | Thickness (mm) | Diameter (cm) |
|---------------|--------------|----------------|---------------|
| 1             | 0            | 0.95           | 2             |
| 2             | 0            | 1.2            | 2             |
| 3             | 25           | 0.95           | 2             |
| 4             | 25           | 1.2            | 2             |
| 5             | 50           | 0.95           | 2             |
| 6             | 50           | 1.2            | 2             |

**Table S2.**  $I_D/I_G$  ratio obtained by current method compared with literature.

**Table S3.**

| Production method | Type of Graphene | I <sub>D</sub> /I <sub>G</sub> | Ref. |
|-------------------|------------------|--------------------------------|------|
| Hummers           | rGO              | 0.88 - 0.92                    | [1]  |
| Hummers           | GO               | 1.14 - 1.19                    | [2]  |
| Hummers           | rGO              | 1.28 - 2.70                    | [2]  |
| Modified Hummers  | GO               | 1.42 - 1.88                    | [3]  |
| Modified Hummers  | rGO              | 1.12 - 1.24                    | [3]  |
| Modified Hummers  | GO               | 0.97                           | [4]  |
| Modified Hummers  | rGO              | 1.15 - 1.4                     | [4]  |
| Modified Hummers  | GO               | 1.07                           | [5]  |
| Current study     | GO               | 0.835                          | -    |

Element analysis of fabricated GO via XPS.

| Name | Peak BE | FWHM eV | Area (p) CPS.eV | Atomic % |
|------|---------|---------|-----------------|----------|
| C1s  | 284.72  | 1.65    | 57958.50        | 68.36    |
| O1s  | 532.65  | 2.07    | 63486.40        | 31.00    |
| N1s  | 401.05  | 0.94    | 850.10          | 0.65     |

**Table S4.** De-convolution of peak C1s into five diverse segments.

| Peak / eV                   | FWHM eV | Area (p) CPS.eV | Atomic % |
|-----------------------------|---------|-----------------|----------|
| Sp <sup>1</sup> (283.78 eV) | 1.65    | 1902.42         | 3.33     |
| Sp <sup>2</sup> (284.78 eV) | 1.48    | 23762.61        | 41.62    |
| Sp <sup>3</sup> (286.85 eV) | 1.35    | 21682.91        | 38.03    |
| C=O (288.61 eV)             | 1.74    | 8006.78         | 14.06    |
| O-C=O (290.48 eV)           | 2.17    | 1682.09         | 2.96     |

**Table S5.** De-convolution of peak N1s into three diverse segments.

| Peak / eV                      | FWHM eV | Area (p) CPS.eV | Atomic % |
|--------------------------------|---------|-----------------|----------|
| Pyridinic Nitrogen (397.33 eV) | 1.92    | 127.18          | 19.87    |
| Pyrrolic Nitrogen (400.19 eV)  | 1.92    | 260.53          | 40.79    |
| Pryidine-N-Oxide (402.08 eV)   | 1.92    | 251.00          | 39.35    |

**Table S6.** De-convolution of peak O1s into four diverse segments.

| Peak / eV        | FWHM eV | Area (p) CPS.eV | Atomic % |
|------------------|---------|-----------------|----------|
| C=O (531.47 eV)  | 1.54    | 11234.61        | 18.08    |
| C-OH (532.66 eV) | 1.54    | 39625.13        | 63.83    |

|                  |      |         |       |
|------------------|------|---------|-------|
| C-O (533.74 eV)  | 1.54 | 8335.48 | 13.44 |
| C-OH (535.53 eV) | 1.92 | 2877.73 | 4.65  |

**Table S7.** XPS and XRD results comparison between previous methods and current study.

| Method          | Type of graphene | sp <sup>1</sup> hybridization (%) | sp <sup>2</sup> hybridization (%) | sp <sup>3</sup> hybridization (%) | d-spacing (Å) | Ref. |
|-----------------|------------------|-----------------------------------|-----------------------------------|-----------------------------------|---------------|------|
| Hummer          | GO               | -                                 | 39                                | 61                                | 8             | [6]  |
| Hummer          | rGO              | 14.6                              | 67.8                              | 17.6                              | 8.133         | [7]  |
| Modified Hummer | GO               | -                                 | 37                                | 63                                | 9             | [6]  |
| Modified Hummer | GO               | 35                                | -                                 | 65                                | 9.06          | [8]  |
| Improved Method | GO               | -                                 | 31                                | 69                                | 9.5           | [6]  |
| Hofmann         | rGO              | 14.2                              | 67.1                              | 18.7                              | 7.226         | [7]  |
| Staudenmaier    | rGO              | 13.2                              | 69.3                              | 17.5                              | 7.084         | [7]  |
| Current study   | GO               | 3.3                               | 41.6                              | 55.1                              | 3.8499        | -    |

**Table S8.** EDAX analysis of hybrid GO-ITN flakes.

| Element | Intensity | Weight % | Atomic % |
|---------|-----------|----------|----------|
| C       | 17.9      | 8.02     | 31.26    |
| N       | 3.1       | 1.87     | 6.26     |
| O       | 64.8      | 11.87    | 34.74    |
| Fe      | 352.3     | 13.39    | 11.23    |
| W       | 247.5     | 64.85    | 16.52    |

**Table S9.** Specification of appeared peaks of iron tungsten nitride's structure.

| Position (2 $\theta$ ) | d-spacing (Å) | (h k l) | Chemical formula                                | Crystalline size (Å) | Micro strain (%) |
|------------------------|---------------|---------|-------------------------------------------------|----------------------|------------------|
| 27.9181                | 3.19588       | (2 2 2) | W <sub>96</sub> Fe <sub>40</sub> N <sub>8</sub> | 157.2079             | 1.01645          |
| 32.3874                | 2.76435       | (0 0 4) | W <sub>96</sub> Fe <sub>40</sub> N <sub>8</sub> | 392.3921             | 0.352243         |
| 46.3768                | 1.95791       | (0 4 4) | W <sub>96</sub> Fe <sub>40</sub> N <sub>8</sub> | 337.9722             | 0.289655         |

Peaks were extracted from reference number 96-200-6776 related to the iron tungsten nitride (i.e., W<sub>96</sub>Fe<sub>40</sub>N<sub>8</sub>) that exhibit cubic structure and its crystalline specifications are as follow: a (Å): 11.11, b (Å): 11.11, c (Å): 11.11, alpha (°): 90, beta (°): 90, gamma (°): 90, calculated density: 24.21 g.cm<sup>-3</sup> and volume of cells 1371.33 × 10<sup>6</sup> pm<sup>3</sup>.

**Table S10.** Performance of the developed shields against incident X-ray waves.

| Sample         | Detected X-ray (μGy) |        |      | Attenuated X-ray (μGy) |        |      | X-ray Absorption (%) |        |        |
|----------------|----------------------|--------|------|------------------------|--------|------|----------------------|--------|--------|
|                | 30 kV                | 40 kV  | 60kV | 30 kV                  | 40 kV  | 60kV | 30 kV                | 40 kV  | 60kV   |
| <b>Control</b> | 141.2                | 1003   | 2178 | -                      | -      | -    | -                    | -      | -      |
| <b>1</b>       | 123.9                | 912.3  | 2037 | 17.3                   | 90.7   | 141  | 12.252               | 9.0428 | 6.473  |
| <b>2</b>       | 121.4                | 900.8  | 2015 | 19.8                   | 102.2  | 163  | 14.022               | 10.189 | 7.483  |
| <b>3</b>       | 72.14                | 678.6  | 1717 | 69.06                  | 324.4  | 461  | 48.909               | 32.342 | 21.166 |
| <b>4</b>       | 55.71                | 584.9  | 1566 | 85.49                  | 418.1  | 612  | 60.545               | 41.684 | 28.099 |
| <b>5</b>       | 38.98                | 481.01 | 1372 | 102.22                 | 521.99 | 806  | 72.393               | 52.042 | 37.006 |
| <b>6</b>       | 30.96                | 430    | 1198 | 110.24                 | 573    | 980  | 78.073               | 57.128 | 44.995 |

**References:**

- Gupta, B.; Kumar, N.; Panda, K.; Kanan, V.; Joshi, S.; Visoly-Fisher, I. Role of oxygen functional groups in reduced graphene oxide for lubrication. *Scientific Reports* **2017**, *7*, 45030.
- Eigler, S.; Dotzer, C.; Hirsch, A. Visualization of defect densities in reduced graphene oxide. *Carbon* **2012**, *50*, 3666-3673.
- King, A.A.; Davies, B.R.; Noorbehesht, N.; Newman, P.; Church, T.L.; Harris, A.T.; Razal, J.M.; Minett, A.I. A New Raman Metric for the Characterisation of Graphene oxide and its Derivatives. *Scientific reports* **2016**, *6*.
- Rajagopalan, B.; Chung, J.S. Reduced chemically modified graphene oxide for supercapacitor electrode. *Nanoscale research letters* **2014**, *9*, 535.
- Gupta, V.; Sharma, N.; Singh, U.; Arif, M.; Singh, A. Synthesis and characterization of Graphene Oxide. *Optik-International Journal for Light and Electron Optics* **2017**.
- Marcano, D.C.; Kosynkin, D.V.; Berlin, J.M.; Sinitskii, A.; Sun, Z.; Slesarev, A.; Alemany, L.B.; Lu, W.; Tour, J.M. Improved synthesis of graphene oxide. **2010**.
- Poh, H.L.; Šaněk, F.; Ambrosi, A.; Zhao, G.; Sofer, Z.; Pumera, M. Graphenes prepared by Staudenmaier, Hofmann and Hummers methods with consequent thermal exfoliation exhibit very different electrochemical properties. *Nanoscale* **2012**, *4*, 3515-3522.
- Tao, C.-a.; Wang, J.; Qin, S.; Lv, Y.; Long, Y.; Zhu, H.; Jiang, Z. Fabrication of pH-sensitive graphene oxide-drug supramolecular hydrogels as controlled release systems. *Journal of Materials Chemistry* **2012**, *22*, 24856-24861.
